# Supplementary material for: Loneliness and Risk of Dementia
Source: Oxford University Press journal article supplement (doi:10.1093/geronb/gby112), 2018-10-03
Supplement: gby112_suppl_supplemental_table_1.docx [file gby112_suppl_supplemental_table_1.docx]

Supplemental Table 1

*Correlations Among All Study Variables*

|  |  | 1. | 2. | 3. | 4. | 5. | 6. | 7. | 8. | 9. | 10. | 11. | 12. |
| --- | --- | --- | --- | --- | --- | --- | --- | --- | --- | --- | --- | --- | --- |
| 1. Loneliness |  | -- |  |  |  |  |  |  |  |  |  |  |  |
| 2. Social isolation |  | .24** | -- |  |  |  |  |  |  |  |  |  |  |
| 3. Age |  | -.07** | .08** | -- |  |  |  |  |  |  |  |  |  |
| 4. Gender |  | .06** | -.01 | -.04** | -- |  |  |  |  |  |  |  |  |
| 5. Race (African American) |  | .05** | .04** | -.06** | .05** | -- |  |  |  |  |  |  |  |
| 6. Race (Other) |  | .02* | .00 | -.12** | .00 | -.08** | -- |  |  |  |  |  |  |
| 7. Hispanic ethnicity |  | .05** | .00 | -.10** | .01 | -.09** | .34** | -- |  |  |  |  |  |
| 8. Education |  | -.11** | -.05** | -.11** | -.06** | -.09** | -.09** | -.31** | -- |  |  |  |  |
| 9. Body mass index |  | .08** | .00 | -.14** | -.01 | .12** | .01 | .03** | -.08** | -- |  |  |  |
| 10. Hypertension |  | .05** | .02* | .19** | .00 | .12** | -.03** | .00 | -.09** | .21** | -- |  |  |
| 11. Diabetes |  | .08** | .03** | .05** | -.05** | .10** | .04** | .07** | -.10** | .24** | .21** | -- |  |
| 12. Smoking |  | .09** | .09** | -.19** | -.01 | .06** | .01 | .00 | -.09** | -.09** | -.06** | -.04** | -- |
| 13. Physical activity |  | -.13** | -.10** | -.10** | -.08** | -.08** | .00 | -.04** | .17** | -.19** | -.12** | -.14** | -.08** |
| 14. Depressive symptoms |  | .40** | .14** | -.05** | .10** | .05** | .03** | .120** | -.18** | .12** | .09** | .10** | .11** |
| 15. Genetic risk |  | .00 | -.01 | -.03** | .02 | .08** | -.03* | -.03** | .01 | -.03** | .00 | -.01 | .00 |
| 16. Memory |  | -.08** | -.08** | -.34** | .16** | -.12** | -.05** | -.09** | .32** | .01 | -.13** | -.10** | -.01 |
| 17. Serial 7s |  | -.10** | -.05** | -.04** | -.12** | -.22** | -.07** | -.14** | .36** | -.04** | -.08** | -.08** | -.07** |
| 18. Backward counting |  | -.02* | -.01 | -.02** | .02* | -.04** | -.01 | -.01 | .07** | -.01 | -.01 | -.02 | -.01 |

* *p*<.05.

** *p*<.01.

|  |  | 13. | 14. | 15. | 16. | 17. | 18. |
| --- | --- | --- | --- | --- | --- | --- | --- |
| 1. Loneliness |  |  |  |  |  |  |  |
| 2. Social isolation |  |  |  |  |  |  |  |
| 3. Age |  |  |  |  |  |  |  |
| 4. Gender |  |  |  |  |  |  |  |
| 5. Race (African American) |  |  |  |  |  |  |  |
| 6. Race (Other) |  |  |  |  |  |  |  |
| 7. Hispanic ethnicity |  |  |  |  |  |  |  |
| 8. Education |  |  |  |  |  |  |  |
| 9. Body mass index |  |  |  |  |  |  |  |
| 10. Hypertension |  |  |  |  |  |  |  |
| 11. Diabetes |  |  |  |  |  |  |  |
| 12. Smoking |  |  |  |  |  |  |  |
| 13. Physical activity |  | -- |  |  |  |  |  |
| 14. Depressive symptoms |  | -.23** | -- |  |  |  |  |
| 15. Genetic risk |  | .00 | .00 | -- |  |  |  |
| 16. Memory |  | .13** | -.11** | -.04** | -- |  |  |
| 17. Serial 7s |  | .11** | -.17** | -.02* | .26** | -- |  |
| 18. Backward counting |  | .03** | -.04** | -.01 | .06** | .12** | -- |

* *p*<.05.

** *p*<.01.
